# Supplementary material for: Dye-sensitized solar cells based on hierarchically structured porous TiO2 filled with nanoparticles
Source: Royal Society of Chemistry journal article supplement (doi:10.1039/c5ta01953b), 2015-01-01
Supplement: c5ta01953b1.pdf [file c5ta01953b1.pdf]

## Supporting Information

### **Dye-Sensitized Solar Cells Based on Hierarchically Structured Porous TiO<sub>2</sub> Filled with Nanoparticles**

*Zhenxuan Zhao*<sup>1</sup>, *Guicheng Liu*<sup>1</sup>, *Bo Li*<sup>2</sup>, *Lixue Guo*<sup>1</sup>, *Chengbin Fei*<sup>1</sup>, *Yajie Wang*<sup>1</sup>, *Lili Lv*<sup>2</sup>, *Xiaoguang Liu*<sup>2</sup>, *Jianjun Tian*<sup>1,2</sup>, *Guozhong Cao*<sup>\*1,3</sup>

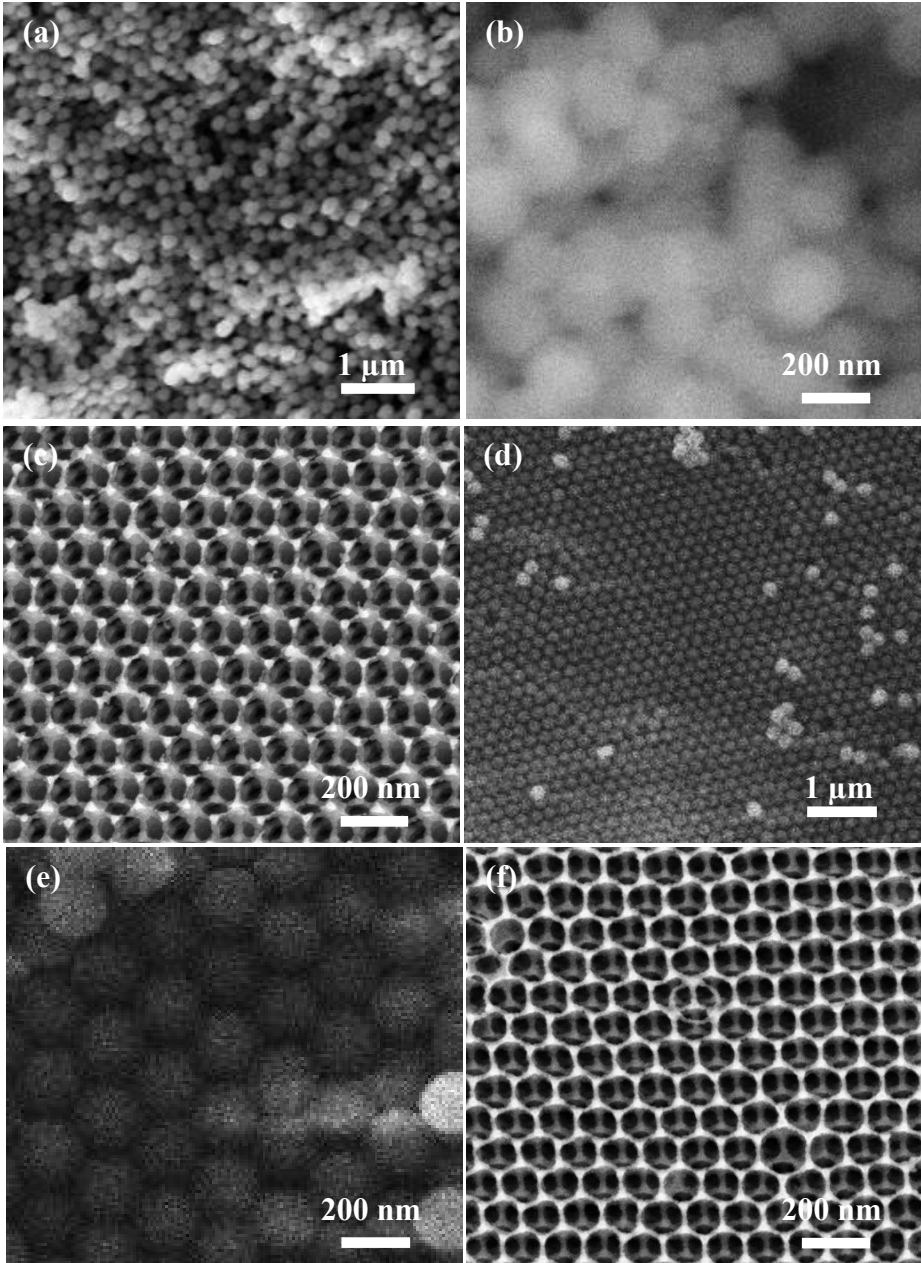

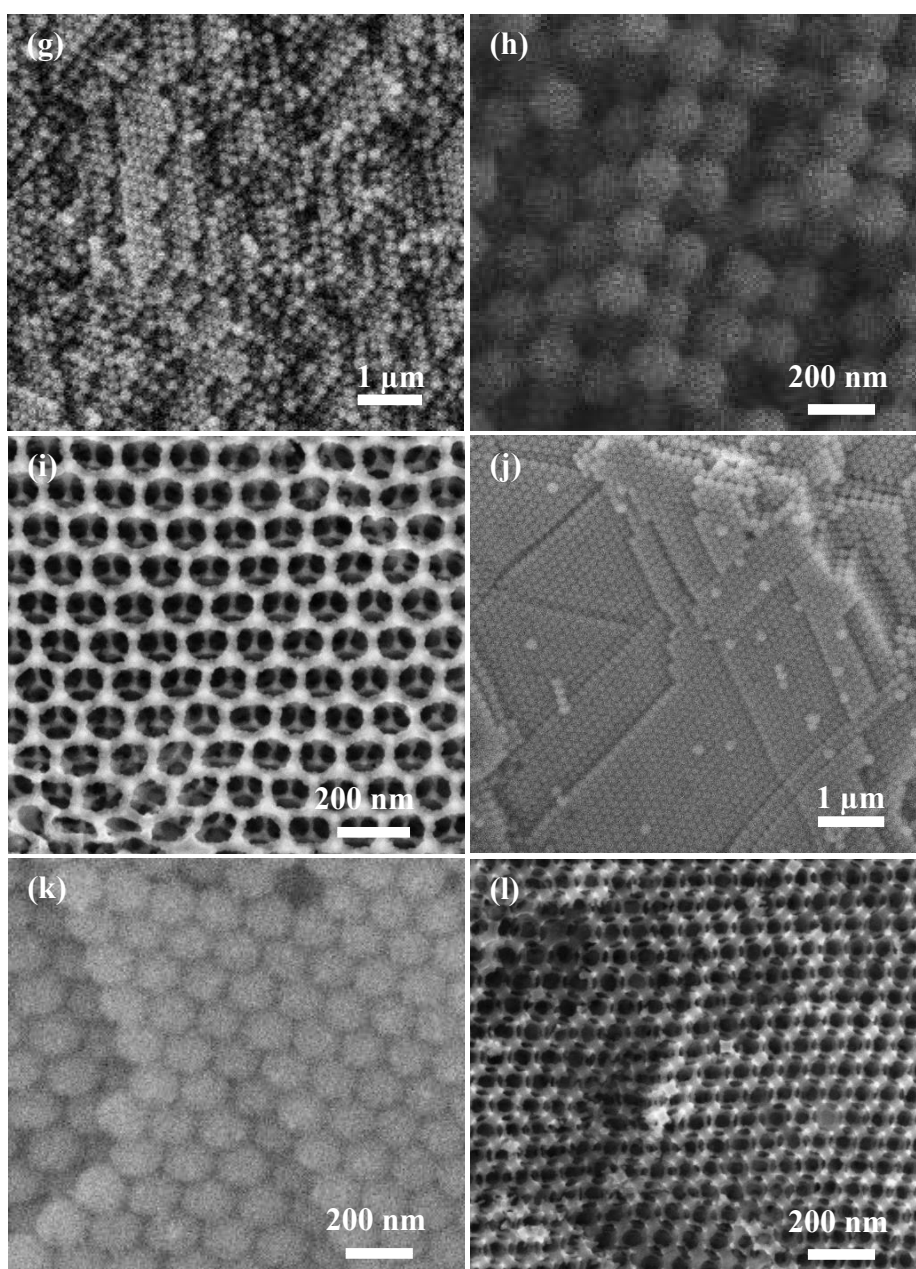

**Figure S1.** SEM images of PMMA- $y$  ( $y$  represents the diameter of PMMA micro-sphere) and the 3DOM-TiO<sub>2</sub>- $x$  samples ( $x = 155$  nm (c), 115 nm (f), 105 nm (j), and 85 nm (l)), copied by the corresponding PMMA-280 (a, b), PMMA-220 (d, e), PMMA-200 (g, h), and PMMA-150 (j, k) micro-spheres, respectively.

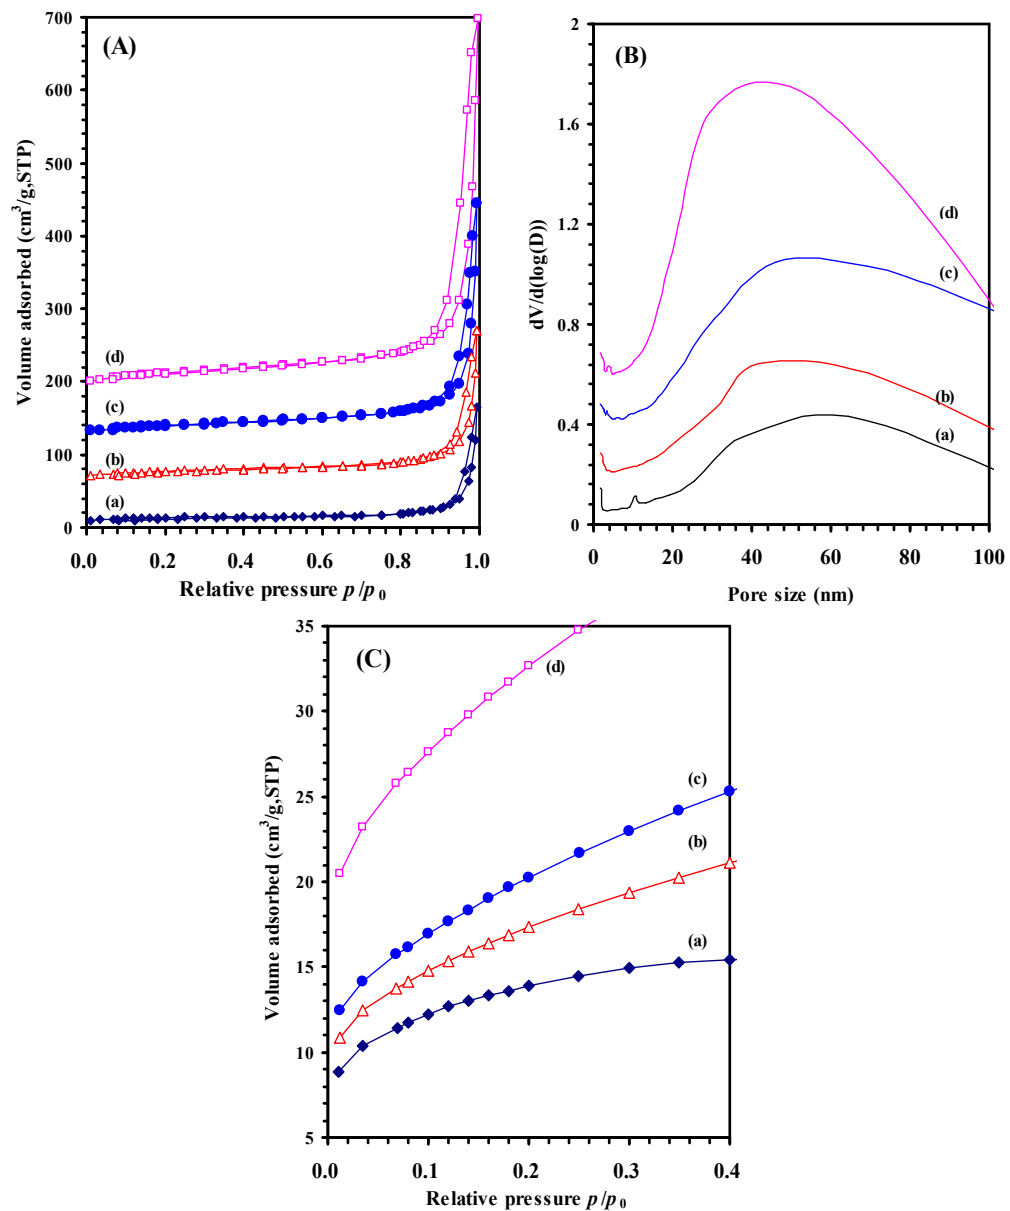

**Figure S2.** (A) N<sub>2</sub> adsorption-desorption isotherms at 77 K and (B) pore-size distributions calculated by the Barrett-Joyner-Halenda (BJH) method and (C) N<sub>2</sub> adsorption isotherms at low-pressure section of (a) Ti-155, (b) Ti-115, (c) Ti-105, and (d) Ti-85 samples.

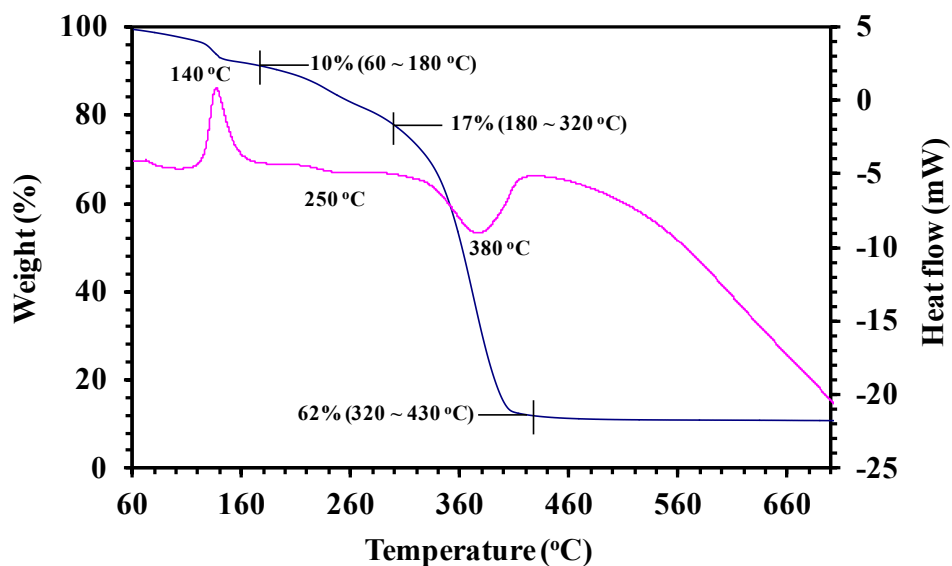

**Figure S3.** TGA/DSC profiles of the representative Ti-105 sample after drying without calcination at high temperatures.

**Figure S3** shows the TGA/DSC profiles of the Ti-105 sample before calcination at high temperatures. It is found that a gradual small weight loss of 10 wt% happened below 180 °C accompanying by the appearance of a exothermal signal at 140 °C, ascribable to the remove of adsorbed water form atomsphere; there were a weight losses of 17 wt% in the 180 – 320 °C and another obvious one of 62 wt% in the range of 320 - 430 wt%. Their correspoing endothermic signals at 250 °C and 380 °C, assignable to the decomposition of Ti precursor and the elimination of the template PMMA and the surfactant PEG. There is no further weight loss above 500 °C indicating that the calcination temperature 550 °C is appropriate for the formation of single crystal-phase TiO<sub>2</sub> crystallinites.

**Table S1.** Textural parameters of the as-prepared three-dimensional ordered hierarchical-porous TiO<sub>2</sub> samples

| Sample | BET surface area<br>(m <sup>2</sup> /g) <sup>a</sup> | Pore diameter <sup>b</sup><br>(nm) | Pore volume <sup>b</sup><br>(cm <sup>3</sup> /g) | surface area/<br>Pore volume (cm <sup>-1</sup> ) |
|--------|------------------------------------------------------|------------------------------------|--------------------------------------------------|--------------------------------------------------|
| Ti-155 | 46.1                                                 | 24.6                               | 0.25                                             | 184                                              |
| Ti-115 | 60.4                                                 | 23.5                               | 0.33                                             | 183                                              |
| Ti-105 | 72.2                                                 | 22.5                               | 0.52                                             | 138                                              |
| Ti-85  | 114.5                                                | 25.6                               | 0.82                                             | 140                                              |

<sup>a</sup> calculated according to BET method, <sup>b</sup> calculated according to BJH method.
